# Supplementary material for: Active surveillance of sodium hyaluronate 0.4% eyedrop: patient knowledge, adherence, and safety findings in real-world use
Source: Research Square preprint supplement (doi:10.21203/rs.3.rs-7704248/v1), 2025-10-16
Supplement: Supplementary file 1 [file d287702912ef655b1b813533.docx]

| **Comparison** | **Statistical** | **P-value†** |
| --- | --- | --- |
| **Schooling and Adherence*** | χ²(df=8) = 22.659, p=0.00383 | - |
| Unfinished Elementary - Low adherence | stdres = 3.56 | **p= 0.0056** |
| Unfinished Elementary - Medium adherence | stdres = -0.98 | **p = 1** |
| Unfinished Elementary - High adherence | stdres = -2.2 | **p= 0.4146** |
| Elementary - Low adherence | stdres = -0.23 | **p= 1** |
| Elementary - Medium adherence | stdres = 1.28 | **p= 1** |
| Elementary - High adherence | stdres = -1.14 | **p= 1** |
| Middle school - Low adherence | stdres = 0.48 | **p= 1** |
| Middle school - Medium adherence | stdres = -0.05 | **p= 1** |
| Middle school - High adherence | stdres = -0.39 | **p= 1** |
| High school - Low adherence | stdres = -1.94 | **p= 0.7861** |
| High school - Medium adherence | stdres = 1.1 | **p= 1** |
| High school - High adherence | stdres = 0.59 | **p= 1** |
| Higher education - Low adherence | stdres = -1.32 | **p= 1** |
| Higher education - Medium adherence | stdres = -1.61 | **p= 1** |
| Higher education - High adherence | stdres = 2.91 | **p= 0.0546** |
| **Schooling and Product knowledge‡** | H(df=4) = 24.038, p < 0.001 |  |
| Higher education - Unfinished elementary school | Z = 3.57 | **p= 0.036** |
| Higher education - Elementary | Z = 4.17 | **p= 0.0003** |
| Higher education - Middle school | Z = 3.33 | **p= 0.0088** |
| Higher education - High school | Z = 1.71 | **p= 0.8663** |
| High school - Unfinished elementary school | Z = 2.11 | **p= 0.3524** |
| High School - Elementary | Z = 2.55 | **p= 0.1075** |
| High school - Middle school | Z = 1.84 | **p= 0.6505** |
| Middle school - Unfinished elementary school | Z = 0.25 | **p= 1** |
| Middle school - Elementary | Z = 0.42 | **p= 1** |
| Elementary - Unfinished elementary school | Z = -0.14 | **p= 1** |
| **Adherence and Product knowledge‡** | H(df=2) = 12.512, p = 0.002 | - |
| High adherence - Low adherence | Z = 3.13 | **p= 0.005** |
| High adherence - Medium adherence | Z = 2.98 | **p= 0.008** |
| Medium adherence - Low adherence | Z = 0.59 | **p= 1** |

Supplementary Table 1. Relation among schooling, patient knowledge and adherence.

*Chi² + residuals. ‡ Kruskal-Wallis + Dunn test. †Bonferroni correction
