# Supplementary material for: Active surveillance of sodium hyaluronate 0.4% eyedrop: patient knowledge, adherence, and safety findings in real-world use
Source: Research Square preprint supplement (doi:10.21203/rs.3.rs-7704248/v1), 2025-10-16
Supplement: Supplementary file 1 [file e821166fdc8c769e0cb63332.pdf]

## LETTER OF PERMISSION

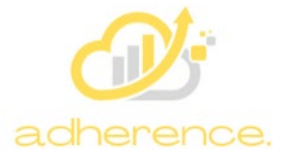

Certificate Number: 7507-1128-3016-6027-2603  
3-Apr-2025

### To Whom It May Concern:

This is to inform you that Homero Contreras- Salinas, principal investigator at Laboratorios Sophia, has my permission to use the MMAS-8 (Morisky Medication Adherence Scale 8 item U.S. Reg. No. TX-8-632-533) in this research study and for publication in all formats i.e. print and digital:

**“Active surveillance of sodium hyaluronate 0.4% eyedrop.”**

The requirements to use this scale are to cite the following reference in the document:

1. Medina-Rodriguez and Lugo-Bautista. Consistency, Reliability, and Validation of the 8-Item Morisky Medication Adherence Scale in Mexican Patients with Depressive Disorders and Type 2 Diabetes Mellitus; Revista APM | . Vol. 4, Núm. 2, 2024 doi:10.5281/zenodo.14523508
2. Krousel-Wood M, Islam T, Webber LS, Re RN, Morisky DE, Muntner P. New medication adherence scale versus pharmacy fill rates in seniors with hypertension. Am J Manag Care. 2009 Jan;15(1):59-66. PMID: 19146365; PMCID: PMC2728593.

Terms and conditions are found here:

<https://adherence.cc/mmas-8>

- i. The following footnote is required in all articles, presentations, web postings, reports and submitted manuscripts, in the Acknowledgment Section of manuscripts submitted for publication:

©MMAS 2006 used with permission [www.adherence.cc](http://www.adherence.cc)

A handwritten signature in black ink, appearing to read 'Donald E. Morisky'.

Donald E. Morisky, Sc.D., M.S.P.H., Sc.M. President

A handwritten signature in black ink, appearing to read 'Philip Morisky'.

Philip Morisky, MBA  
Chief Optimus  
adherence.

[www.adherence.cc](http://www.adherence.cc)

3-Apr-2025

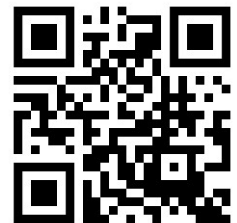

# permission letter\_Homero Contreras- Salinas

Final Audit Report

2025-04-03

|                 |                                             |
|-----------------|---------------------------------------------|
| Created:        | 2025-04-03                                  |
| By:             | Philip Morisky (philm715@icloud.com)        |
| Status:         | Signed                                      |
| Transaction ID: | CBJCHBCAABAP0d7V3oxqf0PQ0SL02SDkCwmLNE-2Snh |

## "permission letter\_Homero Contreras- Salinas" History

-  Document created by Philip Morisky (philm715@icloud.com)  
2025-04-03 - 8:51:27 PM GMT- IP address: 66.214.146.130
-  Document emailed to Philip Morisky (philip.morisky@adherence.cc) for signature  
2025-04-03 - 8:51:31 PM GMT
-  Email viewed by Philip Morisky (philip.morisky@adherence.cc)  
2025-04-03 - 8:51:43 PM GMT- IP address: 66.214.146.130
-  Document e-signed by Philip Morisky (philip.morisky@adherence.cc)  
Signature Date: 2025-04-03 - 8:52:09 PM GMT - Time Source: server- IP address: 66.214.146.130
-  Agreement completed.  
2025-04-03 - 8:52:09 PM GMT
